# Supplementary material for: Metastatic Cutaneous Melanoma in a White African Lioness (Panthera leo)
Source: MDPI journal article supplement (doi:10.3390/vetsci8080154), 2021-08-01
Supplement: s1 [file s1]

# Metastatic Cutaneous Melanoma in a White African Lioness (*Panthera leo*)

Louise van der Weyden, Peter Caldwell, Liesl van Rooyen, Emily P. Mitchell and Nicolize O'Dell

**Table S1.** Diagnostic haematology laboratory report for the lioness. The laboratory-specific reference intervals in use were derived from statistical analysis of results generated from lion samples submitted to IDEXX Laboratories (Pty) Ltd (South Africa).

| Test                              | Result | Reference interval |
|-----------------------------------|--------|--------------------|
| RBC ( $\times 10^{12}/L$ )        | 4.63   | 5.4 – 10.32        |
| Haematocrit (L/L)                 | 0.185  | 0.28 – 0.52        |
| Haemoglobin (g/L)                 | 67     | 90 – 170           |
| MCV (fL)                          | 40     | 41.1 – 56.6        |
| MCH (pg)                          | 14.5   | N/A                |
| MCHC (g/L)                        | 362    | 281 – 389          |
| RDW (%)                           | 27.8   | N/A                |
| Reticulocytes ( $\times 10^9/L$ ) | 44.9   | N/A                |
| Reticulocyte haemoglobin          | 15.3   | N/A                |
| WBC ( $\times 10^9/L$ )           | 24.92  | 6.1 – 16.2         |
| Neutrophils ( $\times 10^9/L$ )   | 21.05  | 3.6 – 13.69        |
| Lymphocytes ( $\times 10^9/L$ )   | 2.28   | 0.4 – 2.6          |
| Monocytes ( $\times 10^9/L$ )     | 1.56   | 0.08 – 0.63        |
| Eosinophils ( $\times 10^9/L$ )   | 0.00   | 0.08 – 0.56        |
| Basophils ( $\times 10^9/L$ )     | 0.03   | 0 – 0.018          |
| Platelets ( $\times 10^9/L$ )     | 359    | 68 – 523           |
| MPV (fL)                          | 16.4   | N/A                |
| Plateletcrit (%)                  | 0.59   | N/A                |

**Table S2.** Diagnostic serum chemistry laboratory report for the lioness. The laboratory-specific reference intervals in use were derived from statistical analysis of previous results generated from lion samples submitted to IDEXX Laboratories (Pty) Ltd (South Africa).

| Test                       | Result | Reference interval |
|----------------------------|--------|--------------------|
| Glucose (mmol/L)           | 5.34   | 4.1 – 9.35         |
| IDEXX SDMA ( $\mu g/dL$ )  | 18     | N/A                |
| Creatinine ( $\mu mol/L$ ) | 189    | 95 – 352           |
| Urea (mmol/L)              | 6.0    | 6.9 – 15.9         |
| Phosphorus (mmol/L)        | 1.81   | 1.27 – 2.19        |
| Calcium (mmol/L)           | 2.20   | 2.16 – 2.73        |
| Sodium (mmol/L)            | 154    | 142 – 160          |
| Potassium (mmol/L)         | 3.6    | 3.7 – 4.9          |
| Chloride (mmol/L)          | 106    | 109 – 129          |
| Total Protein (g/L)        | 90     | 62 – 87            |
| Albumin (g/L)              | 29     | 22 – 44            |
| Globulin (g/L)             | 62     | 22 – 59            |
| ALT (U/L)                  | 42     | 21 – 72            |
| ALP (U/L)                  | <10    | 4 – 33             |

|                            |       |             |
|----------------------------|-------|-------------|
| GGT (U/L)                  | 0     | 0 – 4       |
| Bilirubin – Total (µmol/L) | 17    | 0 – 5.4     |
| Cholesterol (mmol/L)       | 2.67  | 2.3 – 6     |
| Triglyceride (mmol/L)      | 0.48  | 0.17 – 0.64 |
| Amylase (U/L)              | >2500 | N/A         |
| Lipase (U/L)               | 109   | N/A         |

**Table S3.** Diagnostic viral screen laboratory report for the lioness. The assays for Calici Virus, Herpes Virus, Feline Corona Virus and Panleukopaenia Virus are quantitative fluorescent antibody tests, which indicate antibody status as a result of direct or indirect exposure to disease, or vaccination status. In this case, a dilution of 1:20 is very low, indicating a low antibody titre, which makes active infection less likely; thus it was not deemed necessary to do further testing such as PCR or antigen testing. The FIV antibody test as part of the IDEXX SNAP FIV/FelV Combo test is a qualitative rapid screening test which detects the presence of serum antibodies. The viral testing for FELV detects the presence of viral antigen in the serum.

| Test                                                    | Result   |
|---------------------------------------------------------|----------|
| Feline Calici Virus Antibody<br>(Dilution 1:20)         | Positive |
| Feline Herpes Virus Antibody<br>(Dilution 1:20)         | Positive |
| Feline Panleukopaenia Virus Antibody<br>(Dilution 1:20) | Positive |
| Feline Corona Virus Antibody                            | Negative |
| Feline Immunodeficiency Virus (FIV)                     | Negative |
| Feline Leukaemia Virus (FELV)                           | Negative |
